# Supplementary material
Source: PubMed Central journal article supplement (PMC3536093)
Supplement: AEM.02251-12_zam999103949so1.pdf [file AEM.02251-12_zam999103949so1.pdf]

# Supplemental Materials

Tetrathionate-forming thiosulfate dehydrogenase from the acidophilic, chemolithoautotrophic bacterium  
*Acidithiobacillus ferrooxidans*

Mei Kikumoto<sup>1</sup>, Shohei Nogami<sup>1</sup>, Tadayoshi Kanao<sup>1</sup>, Jun Takada<sup>2</sup>, and Kazuo Kamimura<sup>1</sup>

<sup>1</sup>Division of Agricultural and Life Science, Graduate School of Environmental and Life Science, Okayama University, 1-1 Tsushima-Naka, 3-chome, Kita-ku, Okayama 700-8530, Japan

<sup>2</sup>Division of Chemical and Biological Technology, Graduate School of Natural Science and Technology, Okayama University, 1-1 Tsushima-Naka, 3-chome, Kita-ku, Okayama 700-8530, Japan

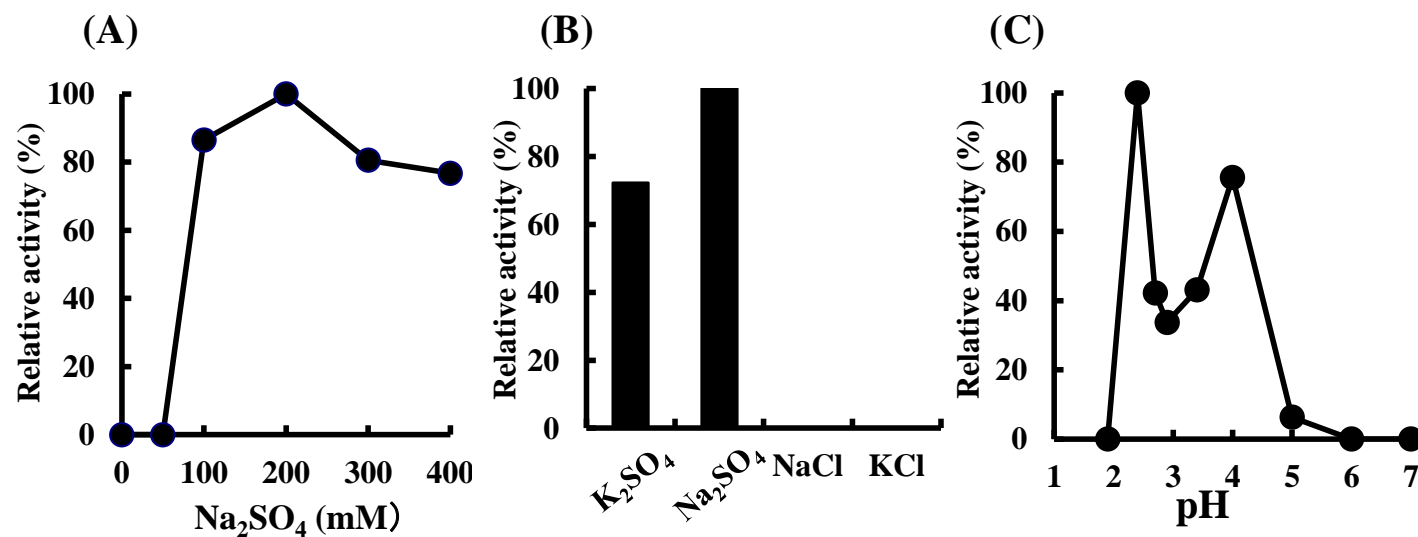

FIG S1 Effect of sulfate ion concentration (A), ions (B), or pH (C) on TSD activity in cell-free extracts from *A. ferrooxidans*. (A) Activity was measured at pH 2.5 and 40°C; (B) activity was measured in the presence of 200 mM of  $\text{K}_2\text{SO}_4$  or  $\text{Na}_2\text{SO}_4$  and 100 mM of NaCl or KCl; (C) activity was measured in the presence of 200 mM Na-sulfate at 40°C. Experiments were carried out in triplicate in a mixture containing 10 mM Na-thiosulfate and 1 mM K-ferricyanide. Each data point is given as the arithmetic mean value. Specific activity for the 100% value was  $0.04 \text{ U} \cdot \text{mg}^{-1}$ .

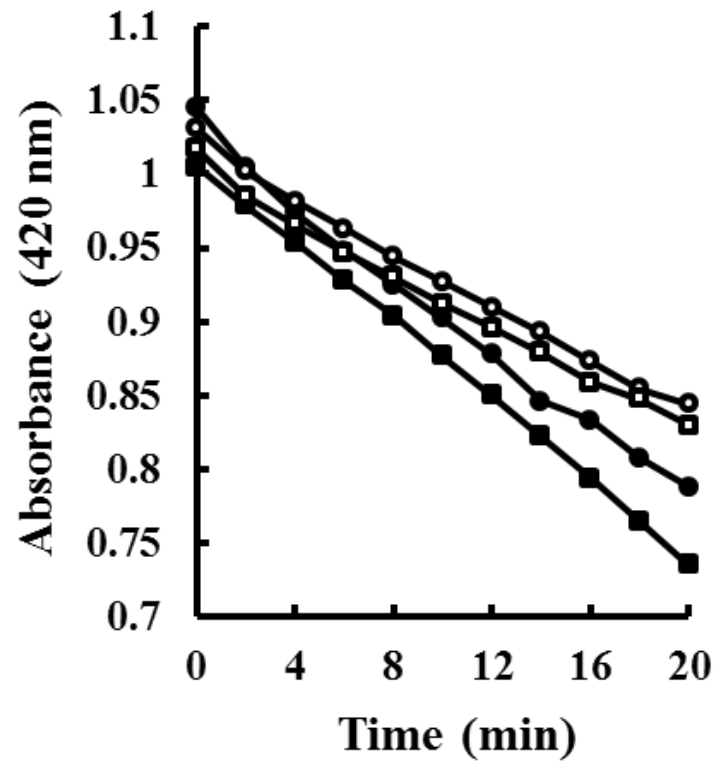

FIG S2 Time course of absorbance changes at 420 nm after mixing thiosulfate and ferricyanide with the soluble fraction (circle) or soluble fraction at pH 4 (square). The enzymatic and non-enzymatic reactions by heat-inactivated enzymes (10 min at 100°C) are shown in black and white, respectively. Reactions were carried out in triplicate in a mixture containing 10 mM Na-thiosulfate, 1 mM K-ferricyanide, 200 mM Na-sulfate, and  $60 \mu\text{g}\cdot\text{mL}^{-1}$  of protein at pH 2.5 and 40°C. Each data point is given as the arithmetic mean value.

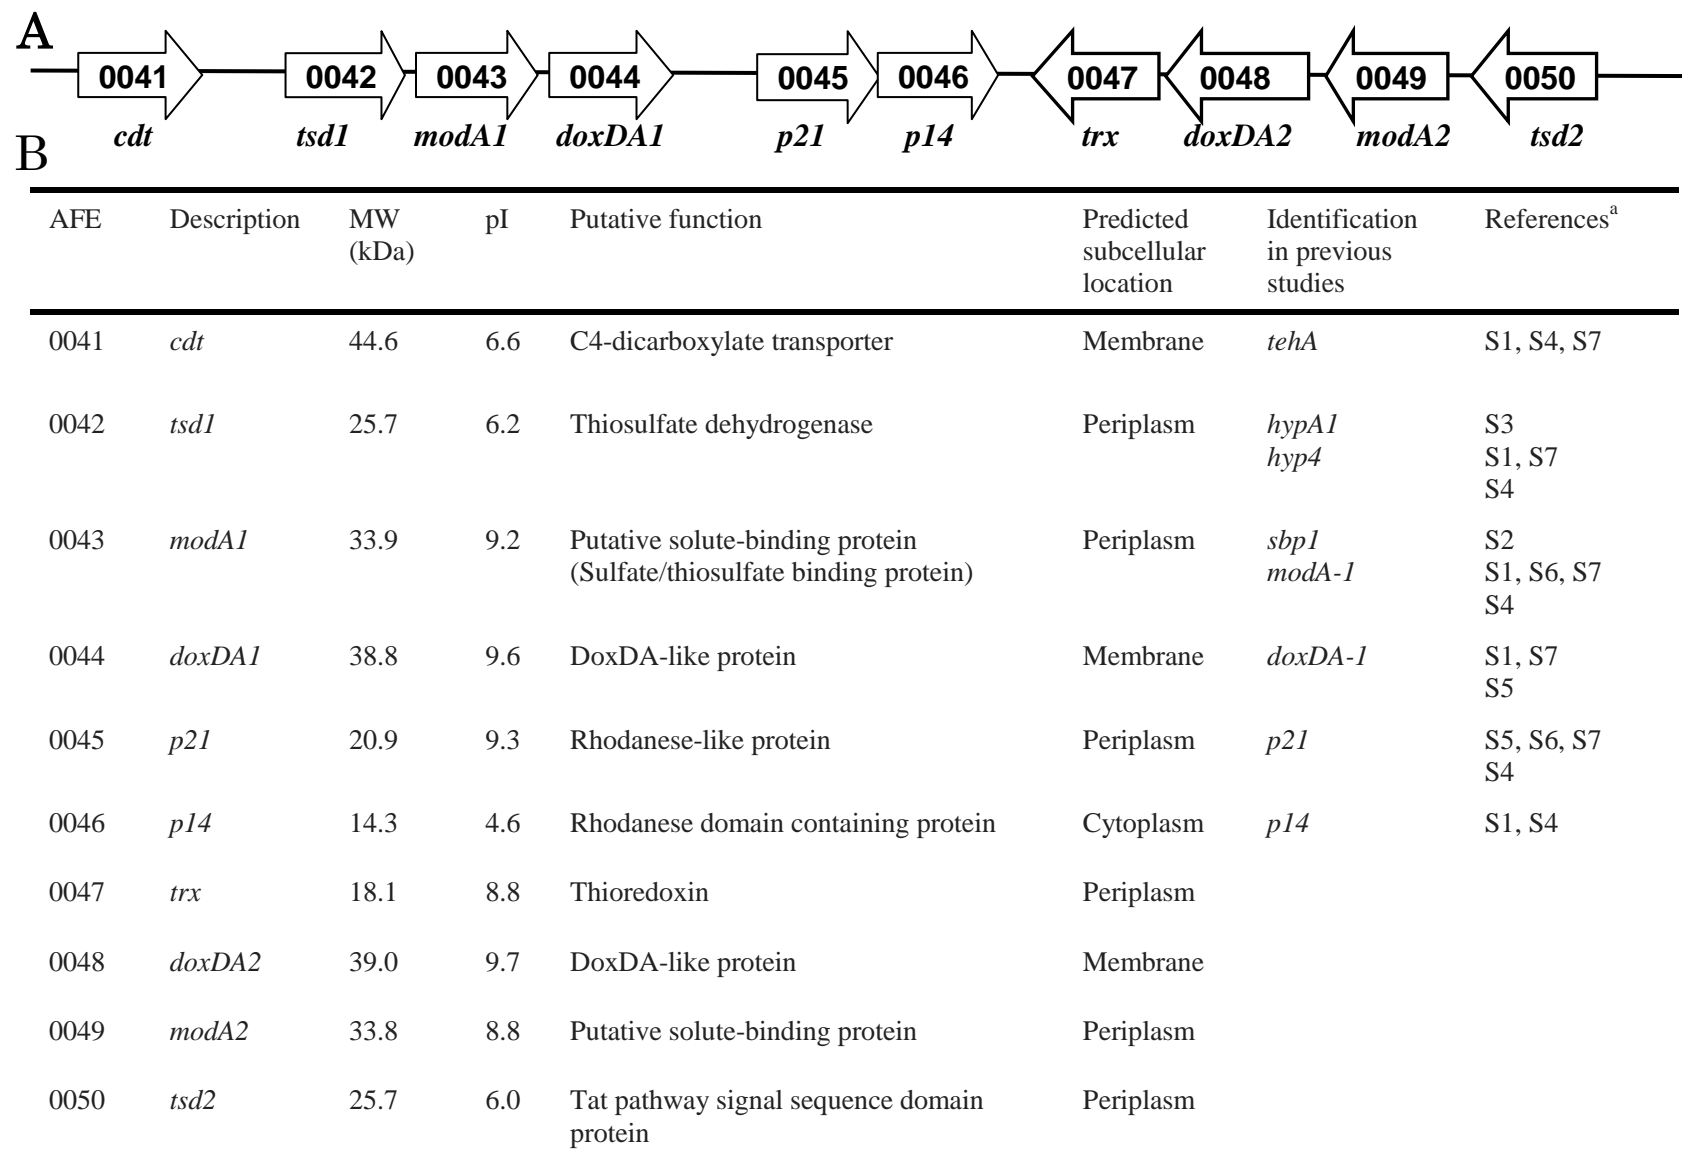

FIG S3 (A) Schematic map of the contig region containing the putative gene cluster context around gene *tsd* from *A. ferrooxidans*. (B) Putative functions of AFEs present in this region (see reference S6). AFE, derived from the NCBI numbering. Molecular weight (MW), pI, and export signal prediction was done with sequences from a local database. MW was estimated using the putative amino acid sequence without the signal peptide. <sup>a</sup> see reference section.

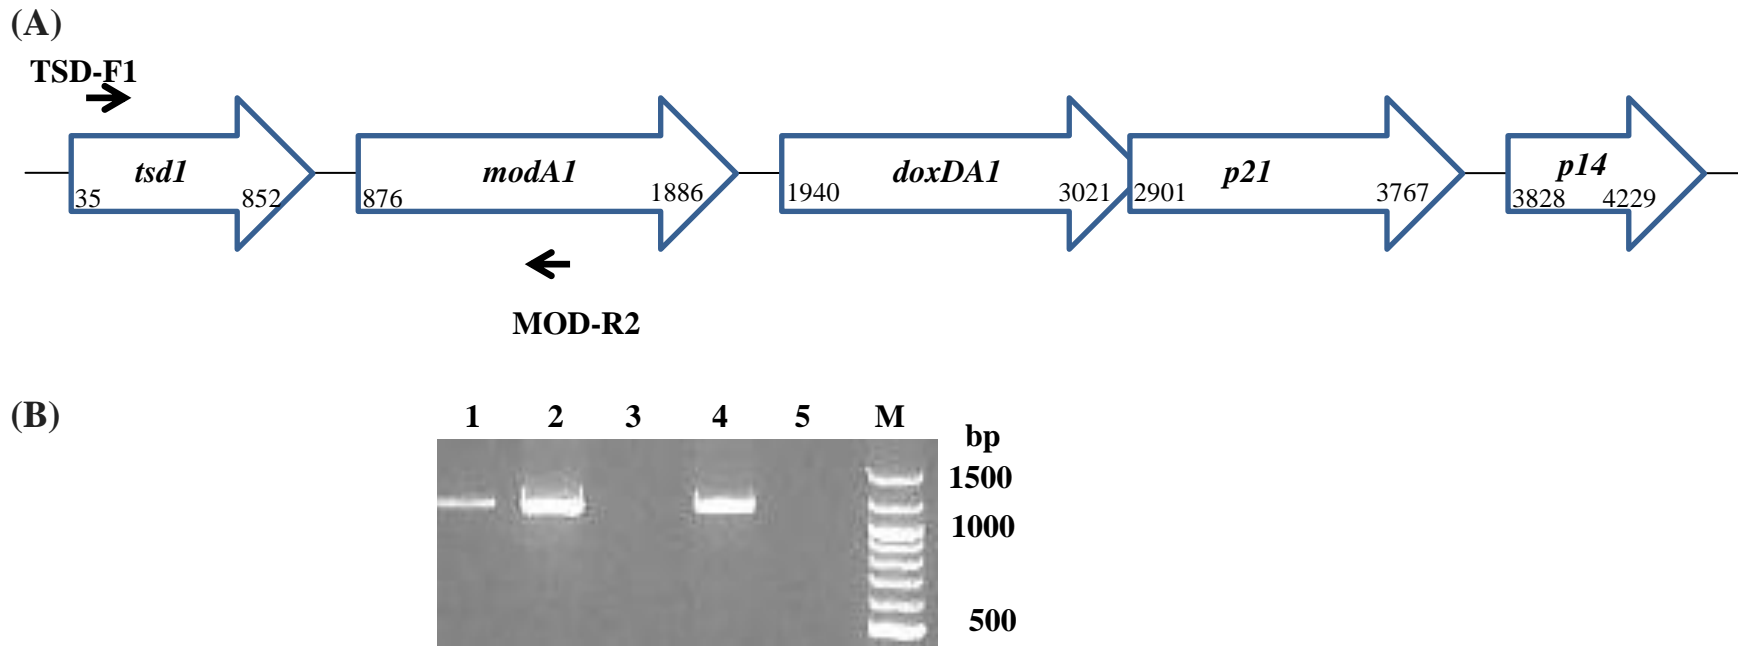

FIG S4 Transcriptional analysis of *tsd* gene in *A. ferrooxidans* ATCC 23270 by RT-PCR.

(A) Schematic map of the genetic context around the *tsd* gene in *A. ferrooxidans* ATCC 23270. Arrows indicate locations of primers used for the RT-PCR. The following primers were used; TSD-F1 (5'-GCTGCAGGAATTGAGTAACC-3') and MOD-R2 (5'-TCCACGTCATGTTGCCGATG-3').

(B) Agarose gel electrophoresis of DNA fragments amplified by RT-PCR. PCR products were analyzed by electrophoresis on 2% agarose gel. The following DNAs were used as the template DNA: Lane 1, cDNA prepared from sulfur-grown cells; Lane 2, cDNA prepared from tetrathionate-grown cells; Lane 3, cDNA prepared from iron-grown cells; Lane 4, gDNA prepared from iron-grown cells; Lane 5, control (without DNA); lane M, 100 bp DNA ladder marker.

|                     |   |                                                                                    |    |
|---------------------|---|------------------------------------------------------------------------------------|----|
| AFE_0042            | 1 | MSN-----ESNL-LSRREAMKRTVL-GAGAVAVGALGANASAMAAGMSGNPANLLPTGAGTLQEELSNRLAKAPRRRDFK   | 72 |
| Acife_2603          | 1 | MIN-----ESNL-LNRREAMKRAVL-GAGVVAVGAMGASASAMAAGMSGNPGNLLPPGASTLQEELSNRLAKAPRRRDFK   | 72 |
| AFE_0050            | 1 | MSN-----EQNL-LSRRDAMKHALW-GAGALAVGAVGTQTSAVAAGLSGNPGNLLPTGARS LKELGERLAKTPRRRDFK   | 72 |
| Tint_0029           | 1 | MST-----HSPVQPSRRALQSTLVAGLGLTALGA--KTAQAASAQERF-----MPQGASTLAEELGKKLAAAPRRRDFK    | 67 |
| ACMV_19130          | 1 | MSDTGQTERDSSLQLSRRALSLPAV-GVGTAVIGAM--IMPAAEAANSAPPNLIITPESKKLRALAAALAKAPRRRNYK    | 77 |
| HYPMC_2183          | 1 | MT-----MTG-----RRQALQAFGL-ALAAASVGGFTREADAAAAHD-----IPAGASALADLTDRLAKTPRRRDFK      | 61 |
| HY04AAS1_0084       | 1 | MDQ-----SRRNVLKGAIL-GLGAGMVASALNPTAAKAEVGA----LIPKGARTLKELAERLAKAPRRRNFK           | 63 |
| BCAM2440            | 1 | MSD-----RHA-----RRDALKTLGL-AAGTVLLAA-TRPAHAAAPDTG----TLLPGGAARLADLTRRLAATPRRRDFK   | 64 |
| Gobo1_010100016936  | 1 | MND-----MTSNLRADRRHALLGLMA-ATAGATIAT-TSTALAAARSSSS----H--ADGTGNLAVLTSQLARS PRRRDFR | 67 |
| GeurL1_010100014279 | 1 | MND-----MTSNLRADRRHALLGLMA-ATAGATIAT-TSTALAAARSSSS----H--ADGTGNLAVLTSQLARS PRRRDFR | 67 |
| GOX2656             | 1 | MND-----MTSNLRADRRHALLGLMA-ATAGATIAT-TSTALAAARSSSS----H--ADGTGNLAVLTSQLARS PRRRDFR | 67 |
| UBAL3_43660050      | 1 | M-----SRSMSRREMLGMLAMGTAGVALGLGGGKVPLASASEHL---DLQPRGDHHLHALLSALARAKRRRDYR         | 67 |
| LFE_1996            | 1 | M-----SESVSRREMLGMVATIGAAGAALGLGVGKLPAAAASEKL---DLEPKGDHHLKALLRALERAKRRDYK         | 67 |

|                     |    |                                                                                   |     |
|---------------------|----|-----------------------------------------------------------------------------------|-----|
| AFE_0042            | 73 | TVPMLLTSPDQWDSEALDEILHYAGGPKQVWDNTALTSPWLNLMRNSMNVQIWSFKHP--DFLALSATHGSAHFALYDNY  | 150 |
| Acife_2603          | 73 | TVPMLLTSPDQWDSEALNEVLHYAGGPKQVWDNTVLKSPWLNLMRNAMNCQIWSFKHA--DFFCASATHGSAHLALYDNY  | 150 |
| AFE_0050            | 73 | TVPMLTKPDEWDDAALREIIHYAGGPKQVWDNTDVSSPWLNLMRNSMNVQVWSFRHP--DFLCVSATHGSAHWALYDDF   | 150 |
| Tint_0029           | 68 | TTQMVLENRDEWDAEALDLVLAYAGQPKQVWNNTNLEGPWLNLMRNAMNAQIWSFKHP--DFLAVSATHGSAHLALYDDA  | 145 |
| ACMV_19130          | 78 | SVPMLTNSDQWDSEALHILFTYAAGPKQIWDNTDLTGPWLNLMRNAMNAQIWSWKHP--NFIAVSATHGSAHLALYDNY   | 155 |
| HYPMC_2183          | 62 | TVPMILDHSDQWDDEALKEVLAYKPVTKQAWDVTDIAGPWLNVMRNSINAQIWSFKHP--DFLVVSATHGSAHYALYDQA  | 139 |
| HY04AAS1_0084       | 64 | SLPMVLTDKNQDWEALDEVFNKGGPKQVWDNYDIHSAWLNVMRNAMNAQIWSYKNP--DFLCVSATHGNAHFALYDDY    | 141 |
| BCAM2440            | 65 | TVPMILERPDQWDHAALTEVIGYRGGPKQVWDNTELGPPWLNLMRNSLNAQIWSYGHF--DFLVVSATHGSAHLALFDRI  | 142 |
| Gobo1_010100016936  | 68 | TVPMVLDLPLMWDQAQALDLVIAIRGERKQVWDNTAIDSPWLNLMRNSVNAQVFSFRHP--DFLAVSATHGSAHLALYDQT | 145 |
| GeurL1_010100014279 | 68 | TVPMVLDLPHMWDQAQALDLVIAIRGERKQVWDNTAIDSPWLNLMRNSVNAQVFSFRHP--DFLAVSATHGSAHLALYDQT | 145 |
| GOX2656             | 68 | TVPMVLDLPLMWDQAQALDLVIAIRGERKQVWDNTAIDSPWLNLMRNSVNAQVFSFRHP--DFLAVSATHGSAHLALYDQT | 145 |
| UBAL3_43660050      | 68 | SLTMISLHQDEWDHEALALLLHYHAKPKQVWDNTIFGSPWLNLMRNSLNAQVYSFGKK--DALVLSATHGTAHLGLFDDT  | 145 |
| LFE_1996            | 68 | SVTMISLHKDEWDHEALSLLFHRAKPKQVWDNTVIGSPWLNLMRNSLNAQVYSFGKK--DALVLSATHGTAHLALFDDH   | 145 |

|                     |     |                                                                                   |     |
|---------------------|-----|-----------------------------------------------------------------------------------|-----|
| AFE_0042            | 151 | IWNKY-LATAT-----KGKWKANAWLKQPPASATNPADFEDPEGVFSPHDNSIIVLQRRGAVFLACHNEVWELTMGLH    | 222 |
| Acife_2603          | 151 | IWNKY-LATLT-----KGKWKANAWLKQPPASATNPADFEDAEGVFS PHDNSIIVLQRRGAVFLACHNEVWELTMGLH   | 222 |
| AFE_0050            | 151 | IWNKY-LAQMT-----GGKWKDNEWIKEPPAAADPANFENPEGVFSPGDNSVTVLQRRGAVFLGCHNGIWEITEGVL     | 222 |
| Tint_0029           | 146 | LWAKYQLGSLT-----KGKAKTNTWIKTSLAADADPKSVEDPKGVYSPADNSITVLQERGAVFLACHNAIWELTGHLH    | 218 |
| ACMV_19130          | 156 | IWKKY-ISSFT-----GGKFSSNIWIEEPSAASSPASSFNDPKGVFSPHDNSIIVLQRRGAVFCAHNEVWELTMAVL     | 227 |
| HYPMC_2183          | 140 | MWDKYQFAKIV-----GKGFEKNTLIVDKPAASANPADYESPTGVFSPLNNSIPALQRRGAVFMSCHNAIWEQATKLH    | 212 |
| HY04AAS1_0084       | 142 | VWETY-ITPLT-----KGKLNKVNWLKMKP-GMLEKDSPTDES GAFSPADNSVEALIERGAVFLACHNQTWEMAGALL   | 212 |
| BCAM2440            | 143 | AWDKYGLAKFA-----GAAFPNTLLDAKPAQAKGAQDHELDPGAFSSHDNGIAALQQRGIVFLSCHNAIWE LAERLD    | 215 |
| Gobo1_010100016936  | 146 | IWDKYQLAKLA-----GPAFAFN TLIKT-PDGALDASAHEDPKGLFGAAGNTIPI LQKRGVVFMAHNAIWEQTGKLI   | 217 |
| GeurL1_010100014279 | 146 | IWDKYQLAKLA-----GPAFASN TLIKT-PDGALDASAHEDTKGLFGAAGNTIPI LQKRGVVFMAHNAIWEQTGKLI   | 217 |
| GOX2656             | 146 | IWDKYQLAKLA-----GPAFAFN TLIKT-PDGALDASAHEDPKGLFGAAGNTIPI LQKRGVVFMAHNAIWEQTGKLI   | 217 |
| UBAL3_43660050      | 146 | MWEKYRLYKKA-----GVKSKTNPLIRLS PASTKPLSALNDPHGVLSPE DNNIPVLQARGVVF LACHNMIWELSGALK | 218 |
| LFE_1996            | 146 | MWEKYKLHEKA-----GMKSAQNPL LKRS PASEKPLSDLNPHGVLSPE DNNIPVLQARGVVF LACHNMIWELSGALK | 218 |

AFE\_0042 223 SKGINPDHLSHEEMA AEFTNHLIPGVVLT PGIVGTLPELQLAG-YQYAK----- 270

|                     |     |                                                              |     |
|---------------------|-----|--------------------------------------------------------------|-----|
| Acife_2603          | 223 | NKGINPSKLSHVEMAAEFTNHLIPGAILTPGIVGTLPELELAG-FQYAK-----       | 270 |
| AFE_0050            | 223 | KKGINPDGLSHEQMAAEFTNHLIPGVILTPGVVGTLPPELQLAG-FQYAK-----      | 270 |
| Tint_0029           | 219 | AIGHNPDKVSQAQMAAEFTNHLIPGAVLTPGIVGTLVELENAG-YRYAG-----       | 266 |
| ACMV_19130          | 228 | KRGINPDKLSHEQLAAEFTNHLIPGAILTPGIVGTIPQFELAG-FQYAK-----       | 275 |
| HYPMC_2183          | 213 | EKGVNPDKLEVDALAAELTNHLIPGVVLI PGAVATLPPELQAG-FHYAR-----      | 260 |
| HY04AAS1_0084       | 213 | KAGINPHKLT HDELSADLTNHIIPQAI VTPGVVATIPPELQMRG-FHYINTADFPK-- | 266 |
| BCAM2440            | 216 | GANANPDKLPDLALAADLTNHVIPSAIVTPGAVGTLPELQAG-FTYAK-----        | 263 |
| Gobo1_010100016936  | 218 | EKGINPDHLSHEQMAAELTNHLIDGVVLT PGIVATIPPELQHAG-FGYVK-----     | 265 |
| GeurL1_010100014279 | 218 | EKGINPDRLSHEQMAAELTNHLIDGVVLT PGIVATIPPELQHAG-FGYVK-----     | 265 |
| GOX2656             | 218 | EKGINPDHLSHEQMAAELTNHLIDGVVLT PG-----HRG-NRSLNCNMPVSAT       | 264 |
| UBAL3_43660050      | 219 | KEGTNPDHKTHGEIAAELTNHLIPGVVLT PGIVGTLPLLVEAG-YQYAH-----      | 267 |
| LFE_1996            | 219 | KGVNPDHKTHGEIAAELTNHLIPGVVLT PGIVGTIPLLSEAG-FHYARS-----      | 267 |

**FIG S5 Multiple alignment of thiosulfate dehydrogenase homologues.**

Homologues of thiosulfate dehydrogenase (TSD) were obtained by BLASTP analysis and indicated in accession numbers. The alignment was made using the ClustalW program. Completely conserved residues across all the aligned sequences are indicated by red letters. Highly conserved residues are indicated by blue letters. The same residues as TSD of *A. ferrooxidans* ATCC 23270 were indicated by green letters.

AFE\_0042: Tat pathway signal sequence domain-containing protein [*Acidithiobacillus ferrooxidans* ATCC 23270, YP\_002424556]

Acife\_2603: Tat pathway signal sequence domain-containing protein [*Acidithiobacillus ferrivorans* SS3, YP\_004785011]

AFE\_0050: Tat pathway signal sequence domain-containing protein [*Acidithiobacillus ferrooxidans* ATCC 23270, YP\_002424564]

Tint\_0029: Tat pathway signal sequence domain-containing protein [*Thiomonas intermedia* K12, YP\_003641775]

ACMV\_19130: hypothetical protein [*Acidiphilium multivorum* AIU301, YP\_004284142]

HYPMC\_2183: unnamed protein product [*Hyphomicrobium* sp. MC1, YP\_004675973].

HY04AAS1\_0084: hypothetical protein [*Hydrogenobaculum* sp. Y04AAS1, YP\_002120754]

BCAM2440: hypothetical protein [*Burkholderia cenocepacia* J2315, YP\_002235043]

Gobo1\_010100016936: hypothetical protein [*Gluconacetobacter oboediens* 174Bp2, ZP\_08900025]

GeurL1\_010100014279: hypothetical protein [*Gluconacetobacter europaeus* LMG 18494, ZP\_08903590]

GOX2656: hypothetical protein [*Gluconobacter oxydans* 621H, YP\_190376]

UBAL3\_43660050: protein of unknown function [*Leptospirillum ferrodiazotrophum*, EES53836]

LFE\_1996: unnamed protein product [*Leptospirillum ferrooxidans* C2-3, YP\_005469801]

|                    |   |                                                                                   |    |
|--------------------|---|-----------------------------------------------------------------------------------|----|
| AFE_0043           | 1 | MKKSRTLQVATVAASLLFCGVAAQA-----ADMGWNGKAEAPRYQEQVFPPWQHGENNPAIHQGLEFTVPEVDDLADF    | 75 |
| Acife_1383         | 1 | MKKTTRIARMTLLAACTSMGLWGMTAHA-----ADMGWHGKAEVPRYQEQVFPPWQHGANNTVKKGLNFTVPEVDDLADF  | 75 |
| AFE_0049           | 1 | MTKSSTLRLAPLLAAASLMVFGTCAVA-----ADNGWGAPGEFHGTSQVFPWQNGANNPATSKGLDFTIPEVDNLPDF    | 75 |
| Tint_0030          | 1 | MRRIP-LATGTPLLAALLLALPVLAKAQVQVQADTGWQGVHAPQYKETIFPPWQHGANNPALNKGLEFTVPEVNDLPDF   | 79 |
| GOX2657            | 1 | MTPSRIRKTLATAAATFVLSTAAALADPVQ-----WNGKAQTPHYAEDVFPWQHGNNDATRGGFEFTVPEVDVLADF     | 75 |
| Gobo1_010100016941 | 1 | -----MATAAATFVLSTAAALADPVQ-----WNGKAQTPHYAEDVFPWQHGNNDATRGGFEFTVPEVDVLADF         | 65 |
| ACMV_19140         | 1 | MRNRH----IKAVATGLFVLLAGAGLAHATSPHDTGWRGKVQFPQYRGAI FPPWQGGANNDTVNKGFVFTIPEVDDVADF | 76 |
| HYPMC_2184         | 1 | MRANSIVKA-VFGAAIAGTVTLGAI SAQSAE-----QN-----APNI FPPWQHGFNNDATDRGGFEFTVPQVDNLADF  | 66 |
| UBAL3_48660049     | 1 | MKKS-----LASAFLASLTLFLHGGPLSP-----AESLAASSEI FPPWSHGRNNPSPDKGIDVTPVDVNDLPDL       | 65 |
| LFE_1995           | 1 | MNQR-----LMTILAVSLLL---GGVSS-----KTVWADETSTYPPWSHGHNNSVVGKGVNVTPVDVNDLPDL         | 62 |
| METDI0749          | 1 | MARLS-----LPAVLSGLALLAASPAG-----ADPQRDTNRAFPPWQGGANAPARDKGLEFTVHEADNLADF          | 62 |
| ACP_2404           | 1 | MSMYR-----RLLTLLLLMTAGAALAAVQ-----QASAQQGPPWSRGANDPAA-QGYVFQVPDNDVNDLPDL          | 59 |

|                    |    |                                                                                       |     |
|--------------------|----|---------------------------------------------------------------------------------------|-----|
| AFE_0043           | 76 | HGSIDNPQLTIFVGGNYFFAMAPLVKA FEKEYPALRGKIYYETLPPGILIKQMKQGGTITIGNMTWTVKPDVYAAGLKKV     | 155 |
| Acife_1383         | 76 | HGSIDHPQLVIFVGGNYFFAMAPLVAA FEKEYPEIKGKIYYETLPPGILIRMQQGNITVGNMTWTIQPDVYAAGLKKV       | 155 |
| AFE_0049           | 76 | HGSIDNPKLSIFVGGNYFFAMAPLVAA FEKEHPEIKGRIYYETIPPGLLIRQMEHGNITVGNMTWTVKPDVYAAGLQKV      | 155 |
| Tint_0030          | 80 | HGDLDHPKLVIFVAGNYFFAMAPLVQA FEKEHPDFKGRVYETLPPGILLKQMKAGGTITVGNMTWTVKPDVYAAGLKKI      | 159 |
| GOX2657            | 76 | HGDI TNPSLVLYVGGNYFFAMAPLVSA FEHEHPEFSGKIYWETIPPGLLIRQIEAGGTITSGNMTWTA KP DAY FAGLKKI | 155 |
| Gobo1_010100016941 | 66 | HGDI TNPSLVLYVGGNYFFAMAPLVSA FEHEHPEFSGKIYWETIPPGLLIRQIEAGGTITSGNMTWTA KP DAY FAGLKKI | 145 |
| ACMV_19140         | 77 | HGDVDHPRLVLYIGGNYFAVAPLVKMF EKENPQYLKGVFVVTIPPGMLIKAMNADGRFMI GNMSEFA KP DAY LAGLKKV  | 156 |
| HYPMC_2184         | 67 | HGSVTDPKLVLYVGGNYFFAMAPLVDE FEKAHPEFKGRIYWETLPPGLLVHQIKAHGVVTSGNMTWTA KP DAY FAGLVAV  | 146 |
| UBAL3_48660049     | 66 | HGNLSHPRLVLYVGGNYFFAMAPLVKA FEKKYPQIRGGLFYETLPPGLLAKQIGKKGRLTIGNATMTVPGDVYAAGLKKV     | 145 |
| LFE_1995           | 63 | HGNMSPHPELVMYVGGNYFFAMAPLVEA FEKKYPKIRGKLFYETLPPGLLAKQIAEKGRITVGNATMTVPGDLYAAGLGQV    | 142 |
| METDI0749          | 63 | HGDLTNARLILYVGGNYFFAMAPLVAA FEARHP ELAGRVYYETIPPGLLVRQMRAGGRVTVGNMTWTA KP DAY LAGLGAD | 142 |
| ACP_2404           | 60 | HGNPCDARLVLFVIGGNYFFVLPRLIAA FEQQHPELKGHIFYETLPPGILRRQIAHDDTLTLGNLTLRVHPDVYEAGLRV     | 139 |

|                    |     |                                                                                    |     |
|--------------------|-----|------------------------------------------------------------------------------------|-----|
| AFE_0043           | 156 | NAFIKEGLLQGPVAVPYVTNDLTIMIPKGNPAHITGLQDLGKPGVRLSMPNPAWEGVARQIKMSLTKAGGPALEKMYDTK   | 235 |
| Acife_1383         | 156 | NYLIHQGLLQGPVAVPYVTNDLTIMIAKGNPAHIETLRDLGKPGIRLSMPDPRWEGVARQIQISLHKAGGPALEKMYDTK   | 235 |
| AFE_0049           | 156 | DYYVQHGLLQGPVAVPYVTNDLTIMVPKGNPAHISGLQDLGKPGMRLVMPNPAWEGVARQIKMSLTKAGGPALEKMYDTK   | 235 |
| Tint_0030          | 160 | EAGIHDGVLTKAISVYVNDLTIMVPKGNPAHITGLADLQDLGKPGVRLSMPNPAWEGVARQIEASLTKAGGDALEKMYDTK  | 239 |
| GOX2657            | 156 | DQYIKSGLLAAPVAVPYVTNTLTIMIPKDNPGHVESLKD LGRPGIRLAMPNPEFEGVARQIEASLDKAGGKALANAVYKTK | 235 |
| Gobo1_010100016941 | 146 | DQYIKSGLLAAPVAVPYVTNTLTIMIPKDNPGHVESLKD LGRPGIRLAMPNPEFEGVARQIEASLDKAGGKALANAVYKTK | 225 |
| ACMV_19140         | 157 | KSLIAAGRLTAPAVAYATNDLTIMVPKGNPDHIRDLADLARKGVKAMPNPAFEGVARQIEASLRKAGGKLEHEIYNTG     | 236 |
| HYPMC_2184         | 147 | KRLVDDGTLAGPPVYVNTLTIMVPKDNPGHVSGLADLGRAGLRIAMPNPEFEGVARQIKASLTKAGGKLEHEIYNTG      | 226 |
| UBAL3_48660049     | 146 | RILIAKLLVGGKPVVYATNDLTIMVPKGNPAGIKGLADLQDLGKPGVRLVMPNPAWEGVARQIKGALAKAGGKLVQAVYVDK | 225 |
| LFE_1995           | 143 | RKLIAKLLVGGPPVAYATNDLTIMVPKGNPAGIKGLSDLGKPGVRLVMPNPAWEGVSRQIKGSLVKAGGKLSKTVYEDK    | 222 |
| METDI0749          | 143 | ERLVREGDLIGPAAPVYVNTQLAIMVPKGNPAKVTGLADLARPGLRAMPNPEFEGVARQIKSALRKAGGEDLVRTVYETK   | 222 |
| ACP_2404           | 140 | RQMOTAGQLHG-VVAYATNDLAIMVAKGNPRGHS LADLARPGLRAMPNPAWEGVANQIAASLRKAGGESLYHAVYQAK    | 218 |



|                    |     |                                                                                     |     |
|--------------------|-----|-------------------------------------------------------------------------------------|-----|
| AFE_0043           | 236 | VKNGETILTHIHHRQTPFLMQGLADAGVTWKSEAIHQEQAGHPISNVPIPAKDNTTAYASAVVKGAAHPKWAKDWNF       | 315 |
| Acife_1383         | 236 | VKNGETILTHVHHRQTPFLMQGLADAGVTWKSEAIHQEQSGHPISNIPPAKDNTTAYASAVAKGALHPKWAKDWNF        | 315 |
| AFE_0049           | 236 | VKNGETILTEIHHRQSPMFLMQGRAVAGVTWKSEAIHQEKIGNPIGNVAIPAQFNKAIYAAA VKDAPHPKWAEAWNF      | 315 |
| Tint_0030          | 240 | VKNGETTLTHIHHRQTPLYLMQGVAVQAGVTWKSEAIHQEQAGHPISNVPIPADQNTTAYAAAVVKGAAHPKAGLMWAEF    | 319 |
| GOX2657            | 236 | IANGSTVLTTHIHHRQTPFLMQGLADAGVTWQSEAIHQEQTGHAISHVDIPADQNSTAIYAGAMVKGAAHPQA AKLWLD    | 315 |
| Gobo1_010100016941 | 226 | IANGSTVLTTHIHHRQTPFLMQGLADAGVTWQSEAIHQEQTGHAISHVDIPADQNSTAIYAGAMVKGAAHPQA AKLWLD    | 305 |
| ACMV_19140         | 237 | VKNGTLLTHIHHRQTPFLMQGLADAGVTWKSEAIHQEEIGHPI SHVDLPARYNTTAYGGAMVKNAPHPHAAKAWLSF      | 316 |
| HYPMC_2184         | 227 | VADGGTILTHIHHRQTPFLMQGHVDAGVTWLSEAMFQEQVGNPITNVVIPADQNTTATYAGAMVKGAAHP EAAKMWLD     | 306 |
| UBAL3_48660049     | 226 | VKNGETVLTTRI HHRQSPMALMRKKADAGVTWRSEAVFQEEGHP IENVSI PDSQNVRAIYAAGIIRGSRHVLWAKRWLTF | 305 |
| LFE_1995           | 223 | VKNGETTLTRI HHRQSPMFLMAKKADAGVTWRSEAIHQEQVGHAIENVAIPDSQNVKAIYAASIIRGARHKLWAKRWLIF   | 302 |
| METDI0749          | 223 | VADGTTTLTRMHHRQTPVWLMQGRADAGVTWRSEAIHQAEANLPTERVDIPADENETGAYAGGAVKDAHPAEALS WLN     | 302 |
| ACP_2404           | 219 | VQSGQTVLTEIHHRQTPMRIMSGQADAGVTWASEVRFQESIGNPIQGLAIPAAQNATAIYAGGALNHAPHPAVAAAWLAF    | 298 |
|                    |     |                                                                                     |     |
| AFE_0043           | 316 | LKSPTALQIFEHYGFKPY-T-GK-----                                                        | 336 |
| Acife_1383         | 316 | LRSPVALHIFERYGFKAYHD-AK-----                                                        | 337 |
| AFE_0049           | 316 | LKSPTALHIFEEYGFQPY-TQGK-----                                                        | 337 |
| Tint_0030          | 320 | LRSPALKIFERYDFKPVSA-HKPG-----                                                       | 343 |
| GOX2657            | 316 | IKSPTALAI FERYGFKAY--HGGSPDHDSE                                                     | 344 |
| Gobo1_010100016941 | 306 | IKSPTALAI FERYGFKAY--HGGSPDHDSE                                                     | 334 |
| ACMV_19140         | 317 | IQSPAALKIFEHYGFKQY----KRV-----                                                      | 337 |
| HYPMC_2184         | 307 | IHSPSALKIFEKYGF-----TPA----                                                         | 324 |
| UBAL3_48660049     | 306 | LKSPEALHVFEHYGFKPV--TRKDL----K-                                                     | 329 |
| LFE_1995           | 303 | LKSPEAQKVFRHFGFKSV--TKADL----KK                                                     | 327 |
| METDI0749          | 303 | LRGAEAREIFARYGFEPY--RANA IPE--RR                                                    | 329 |
| ACP_2404           | 299 | LKTPQAQAIYHQYGFERSLPAAASQK-----                                                     | 323 |

**FIG S6 Multiple alignment of putative sulfate-binding proteins.**

Homologues of putative sulfate-binding protein (SBP) were obtained by BLAST analysis and indicated in accession numbers. The alignment was made using the ClustalW program. Completely conserved residues across all the aligned sequences are indicated by red letters. Highly conserved residues are indicated by blue letters. The same residues as SBP of *A. ferrooxidans* ATCC 23270 were indicated by green letters.

AFE\_0043: putative sulfate-binding protein [*Acidithiobacillus ferrooxidans* ATCC 23270, YP\_002424557]

Acife\_1383: periplasmic solute-binding protein [*Acidithiobacillus ferrivorans* SS3, YP\_004783859]

AFE\_0049: putative sulfate-binding protein [*Acidithiobacillus ferrooxidans* ATCC 23270, YP\_002424563]

Tint\_0030: periplasmic solute-binding protein [*Thiomonas intermedia* K12, YP\_003641776]

GOX2657: putative sulfate-binding protein [*Gluconobacter oxydans* 621H, YP\_190377]

Gobo1\_010100016941: putative sulfate-binding protein [*Gluconacetobacter oboediens* 174Bp2, ZP\_08900026]

ACMV\_19140: hypothetical protein ACMV\_19140 [*Acidiphilium multivorum* AIU301, YP\_004284143]

HYPMC\_2184: unnamed protein product [*Hyphomicrobium* sp. MC1, YP\_004675974].

UBAL3\_48660049: ABC transporter, periplasmic component [*Leptospirillum ferrodiazotrophum*, EES53835]

LFE\_1995: protein product [*Leptospirillum ferrooxidans* C2-3, YP\_005469800].

METDI0749: sulfate-binding protein [*Methylobacterium extorquens* DM4, YP\_003066433].

ACP\_2404: hypothetical protein ACP\_2404 [*Acidobacterium capsulatum* ATCC 51196, YP\_002755444]

TABLE S1 Purification of recombinant TSD from soluble fraction of *E. coli* harboring pET-*tsd*.

| Purification step        | Total protein (mg) | Specific activity ( $\mu\text{mol}\cdot\text{min}^{-1}\cdot\text{mg}^{-1}$ ) | Total activity ( $\mu\text{mol}\cdot\text{min}^{-1}$ ) | Recovery (%) | Purification (fold) |
|--------------------------|--------------------|------------------------------------------------------------------------------|--------------------------------------------------------|--------------|---------------------|
| Cell-free extract        | 260.5              | 0.068                                                                        | 17.7                                                   | 100          | 1                   |
| Soluble fraction at pH 4 | 32.6               | 0.26                                                                         | 8.5                                                    | 48           | 3.8                 |
| Butyl-650M fraction      | 1.1                | 4.16                                                                         | 4.6                                                    | 26           | 61.2                |

Enzyme activity was measured at pH 2.5 and 40°C in mixture containing 1 mM ferricyanide and 10 mM thiosulfate.

## Supplemental References

- S1. **Acosta M, Beard S, Ponce J, Vera M, Mobarec JC, Jerez CA.** 2005. Identification of putative sulfotransferase genes in the extremophilic *Acidithiobacillus ferrooxidans* ATCC 23270 genome: structural and functional characterization of the proteins. *OMICS*. **9**:13–29.
- S2. **Bouchal P, Zdráhal Z, Helánová S, Janiczek O, Hallberg KB, Mandl M.** 2006. Proteomic and bioinformatic analysis of iron- and sulfur-oxidizing *Acidithiobacillus ferrooxidans* using immobilized pH gradients and mass spectrometry. *Proteomics*. **6**:4278–85.
- S3. **Chi A, Valenzuela L, Beard S, Mackey AJ, Shabanowitz J, Hunt DF, Jerez CA.** 2007. Periplasmic proteins of the extremophile *Acidithiobacillus ferrooxidans*: a high throughput proteomics analysis. *Mol. Cell Proteomics*. **6**:2239–2251.
- S4. **Quatrini R, Appia-Ayme C, Denis Y, Jedlicki E, Holmes DS, Bonnefoy V.** 2009. Extending the models for iron and sulfur oxidation in the extreme acidophile *Acidithiobacillus ferrooxidans*. *BMC Genomics*. Doi:10.1186/1471-2164-10-394.
- S5. **Ramírez P, Toledo H, Guiliani N, Jerez CA.** 2002. An exported rhodanese-like protein is induced during growth of *Acidithiobacillus ferrooxidans* in metal sulfides and different sulfur compounds. *Appl. Environ. Microbiol.* **68**:1837–1845.
- S6. **Ramírez P, Guiliani N, Valenzuela L, Beard S, Jerez CA.** 2004. Differential protein expression during growth of *Acidithiobacillus ferrooxidans* on ferrous iron, sulfur compounds or metal sulphides. *Appl. Environ. Microbiol.* **70**:4491–4498.
- S7. **Valenzuela L, Chi A, Beard S, Orell A, Guiliani N, Shabanowitz J, Hunt DF, Jerez CA.** 2006. Genomics, metagenomics and proteomics in biomining microorganisms. *Biotechnol. Adv.* **24**:197–211.
